# Supplementary material for: First principles assessment of the phase stability and transition mechanisms of designated crystal structures of pristine and Janus transition metal dichalcogenides
Source: Royal Society of Chemistry journal article supplement (doi:10.1039/d1cp05642e), 2022-01-01
Supplement: d1cp05642e1.pdf [file d1cp05642e1.pdf]

**First Principles Assessment on Phase Stability and Transition Mechanisms of  
Designated Crystal Structures of Pristine and Janus Transition Metal  
Dichalcogenides**

Öznur Demirkol<sup>a</sup>, Cem Sevik<sup>b,c</sup> and İlker Demiroğlu<sup>d\*</sup>

<sup>a</sup> *Department of Physics, Eskisehir Technical University, Eskişehir, TR 26470, Turkey.*

<sup>b</sup> *Department of Mechanical Engineering, Eskişehir Technical University, Eskişehir, TR 26555, Turkey.*

<sup>c</sup> *Department of Physics, University of Antwerp, Groenenborgerlaan 171, 2020 Antwerp, Belgium*

<sup>d</sup> *Department of Advanced Technologies, Eskisehir Technical University, Eskişehir, TR 26555, Turkey.*

\* E-mail: [ilkerdemiroglu@eskisehir.edu.tr](mailto:ilkerdemiroglu@eskisehir.edu.tr)

S1) 5K AIMD simulations of pristine TMDs: (a) MoS<sub>2</sub>, (b) MoSe<sub>2</sub>, (c) MoTe<sub>2</sub>, (d) WS<sub>2</sub>, (e) WSe<sub>2</sub>, (f) WTe<sub>2</sub>.

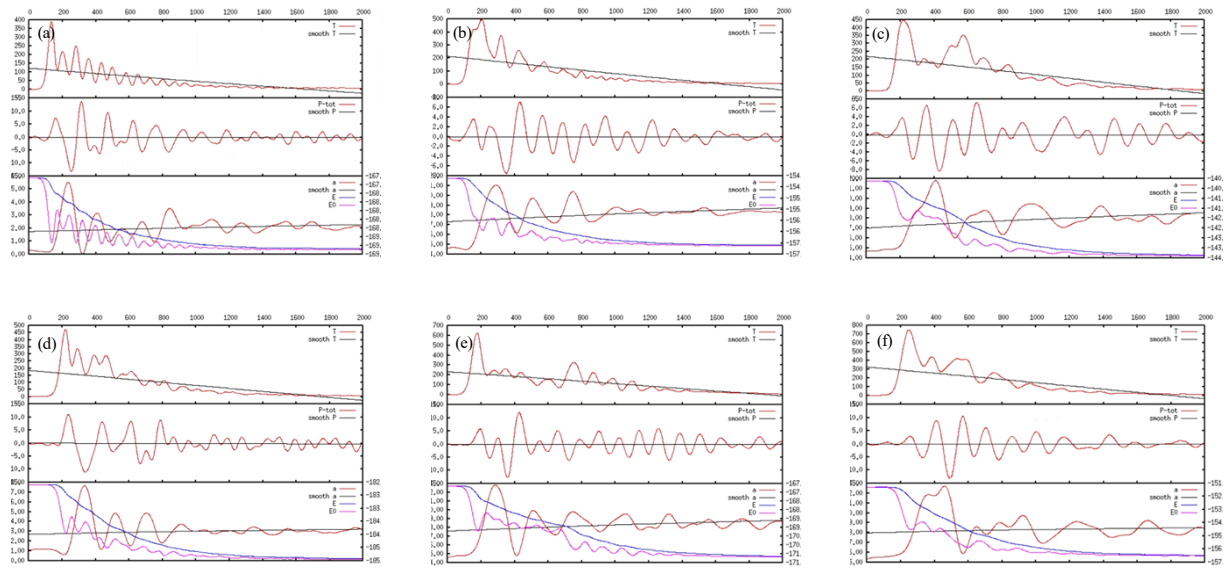

S2) 5K AIMD simulations of Janus TMDs: (a) MoSSe, (b) MoSTe, (c) MoSeTe, (d) WSSe, (e) WSTe, (f) WSeTe.

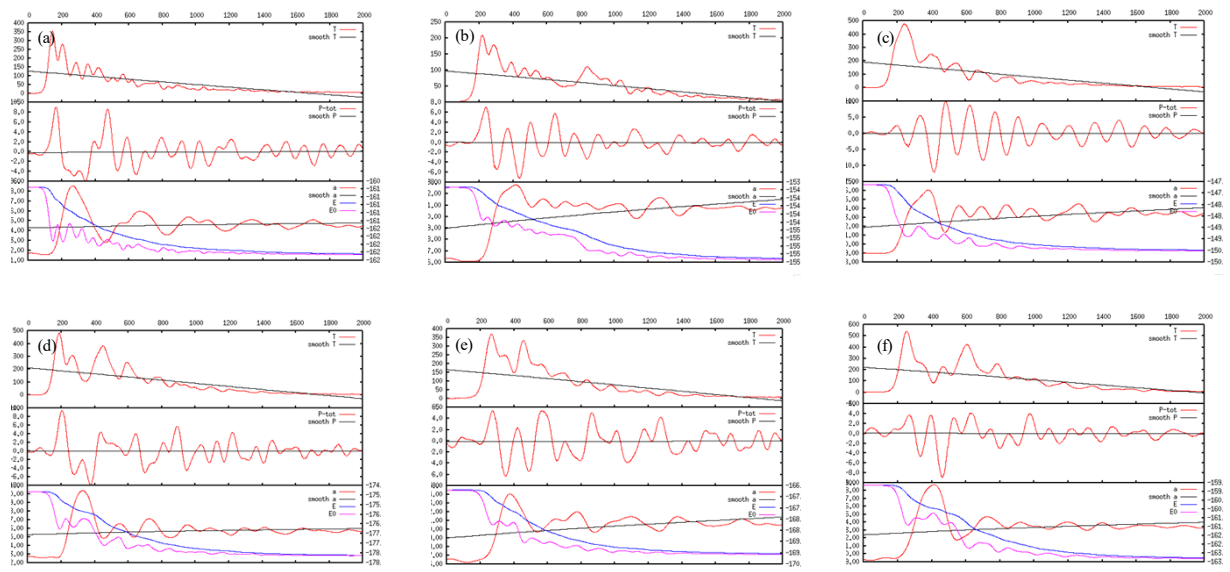

### S3) 300K-2100K AIMD simulations for H, T' and T'' phases of MoS<sub>2</sub>

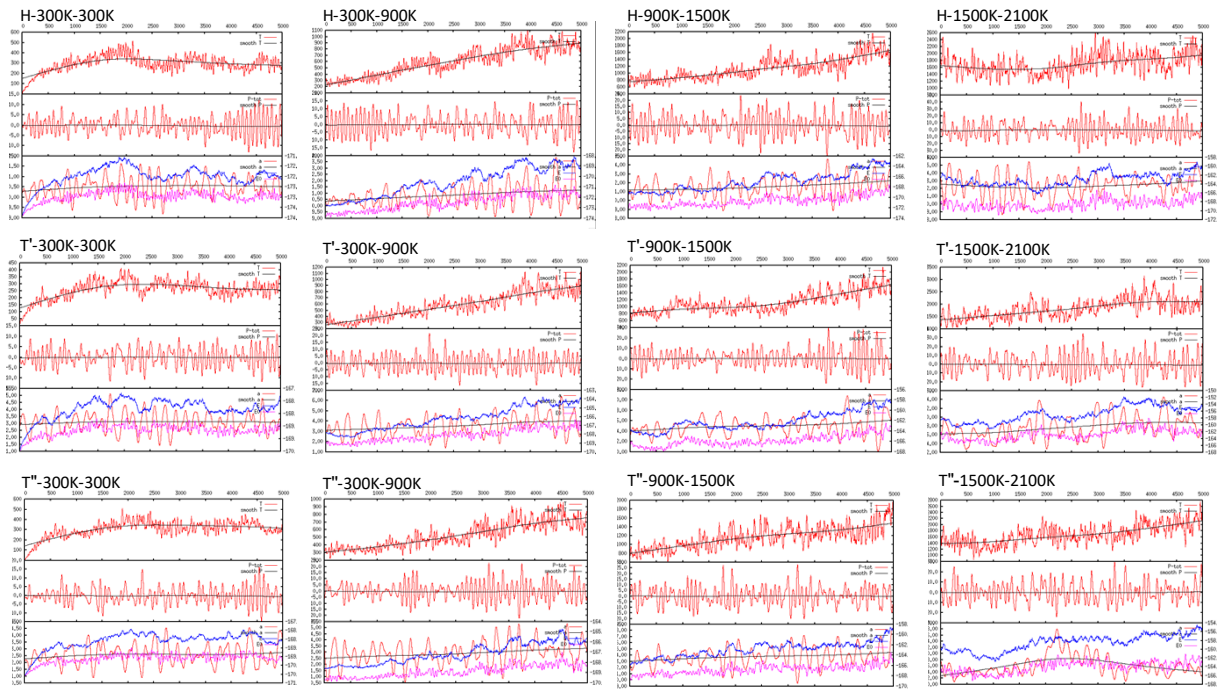

### S4) 300K-2100K AIMD simulations for H, T' and T'' phases of MoSe<sub>2</sub>

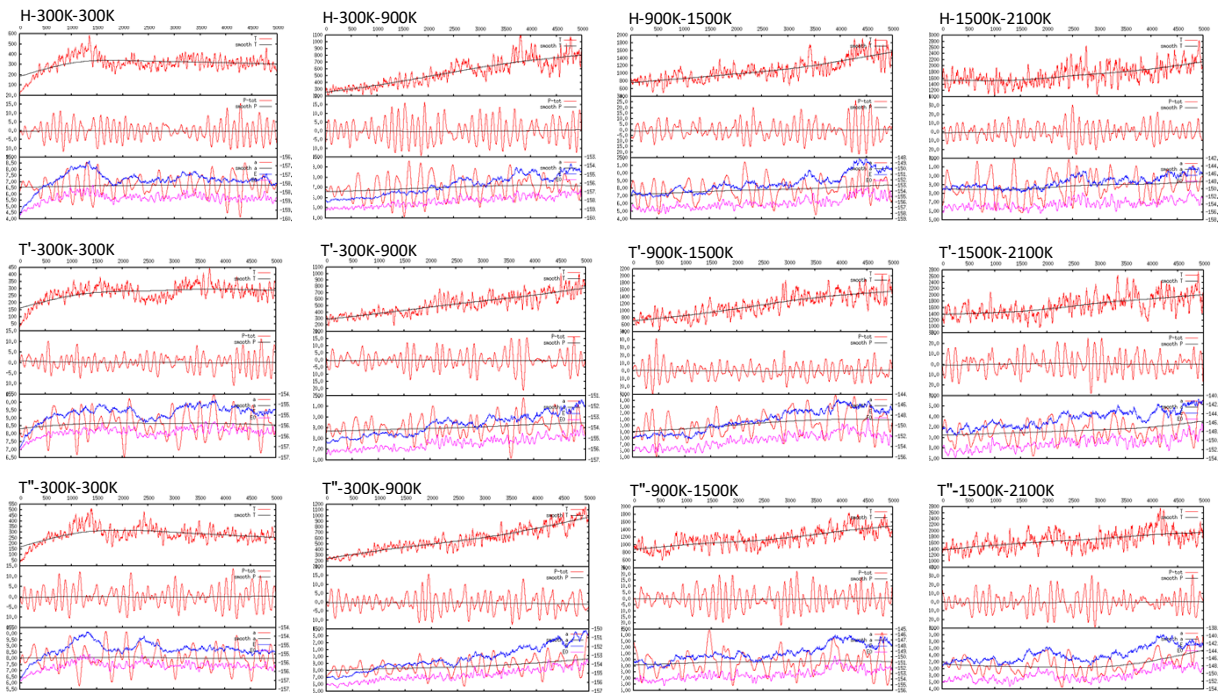

S5) 300K-2100K AIMD simulations for H, T' and T'' phases of MoTe<sub>2</sub>

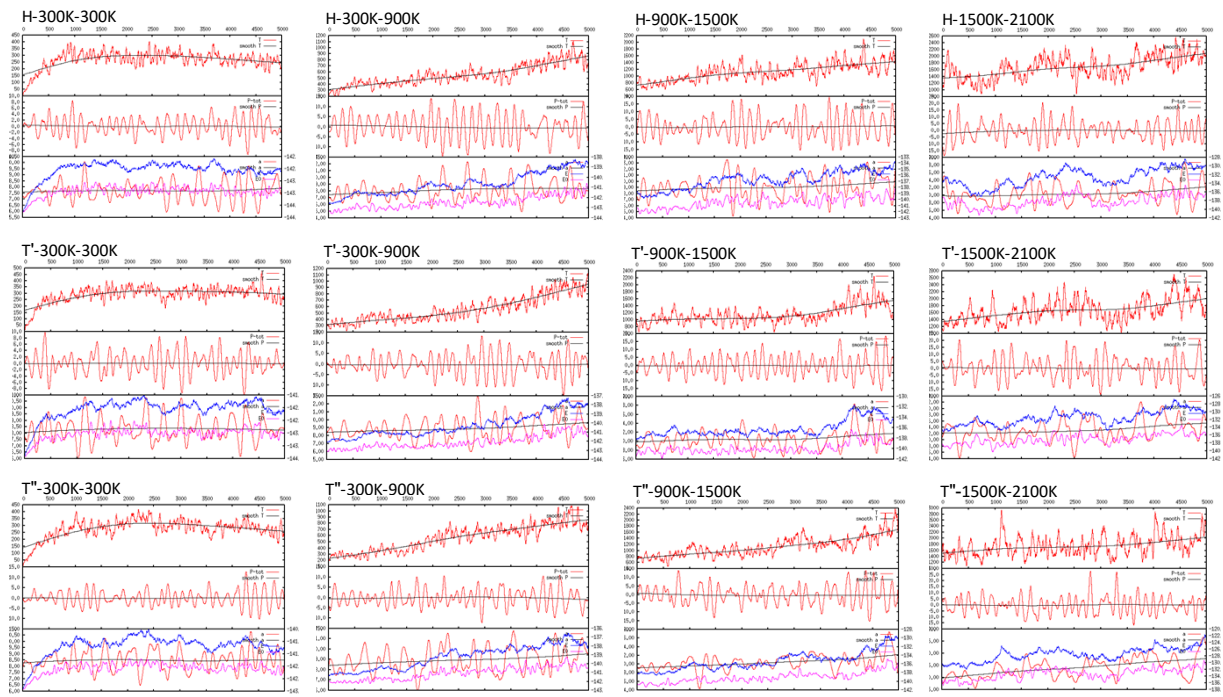

S6) 300K-2100K AIMD simulations for H, T' and T'' phases of WS<sub>2</sub>

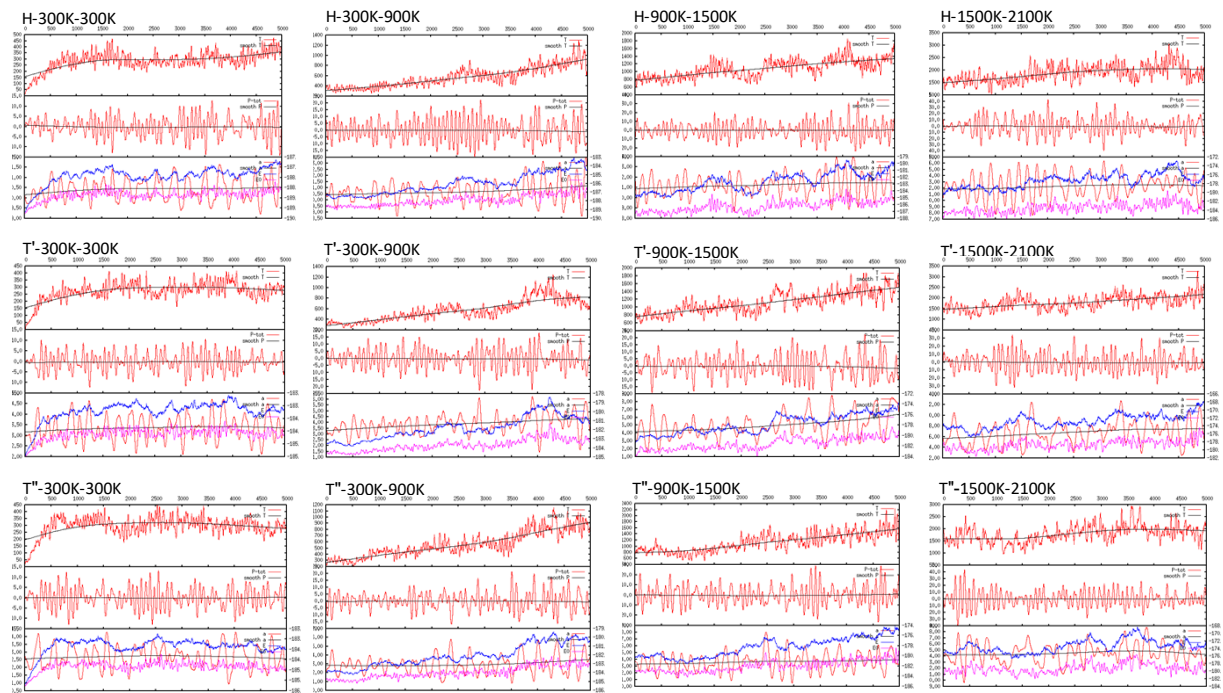

S7) 300K-2100K AIMD simulations for H, T' and T'' phases of WSe<sub>2</sub>

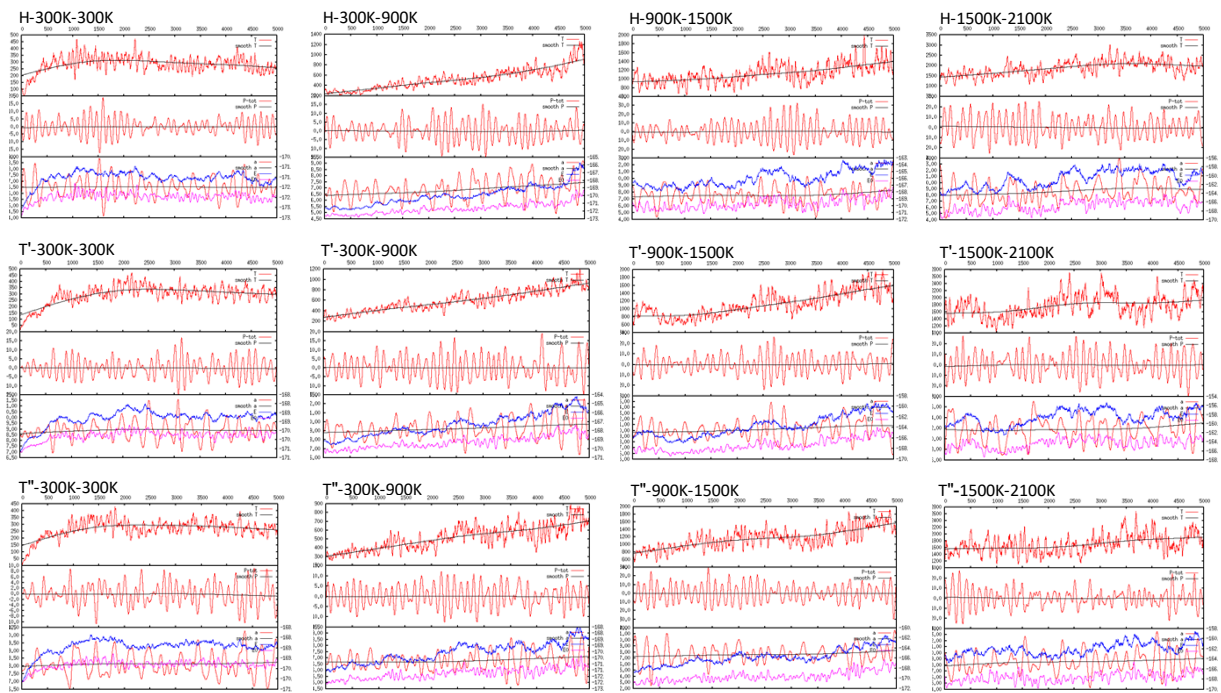

S8) 300K-2100K AIMD simulations for H, T' and T'' phases of WTe<sub>2</sub>

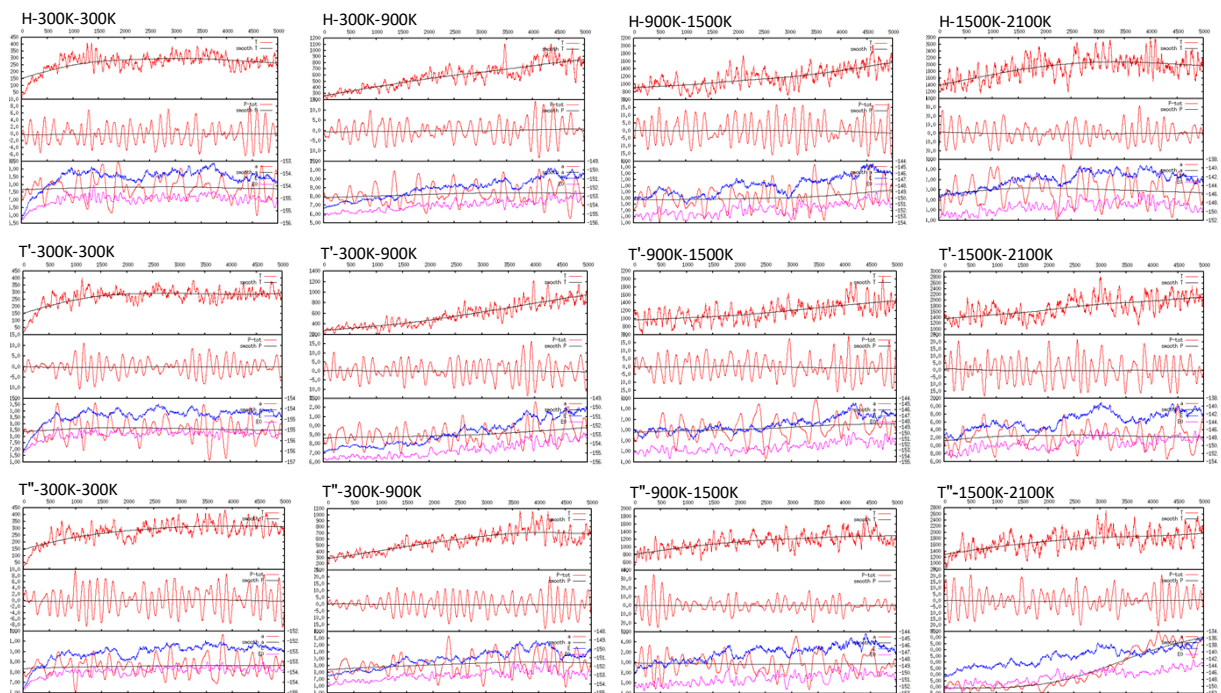

S9) 300K-2100K AIMD simulations for H, T' and T'' phases of MoS<sub>2</sub>

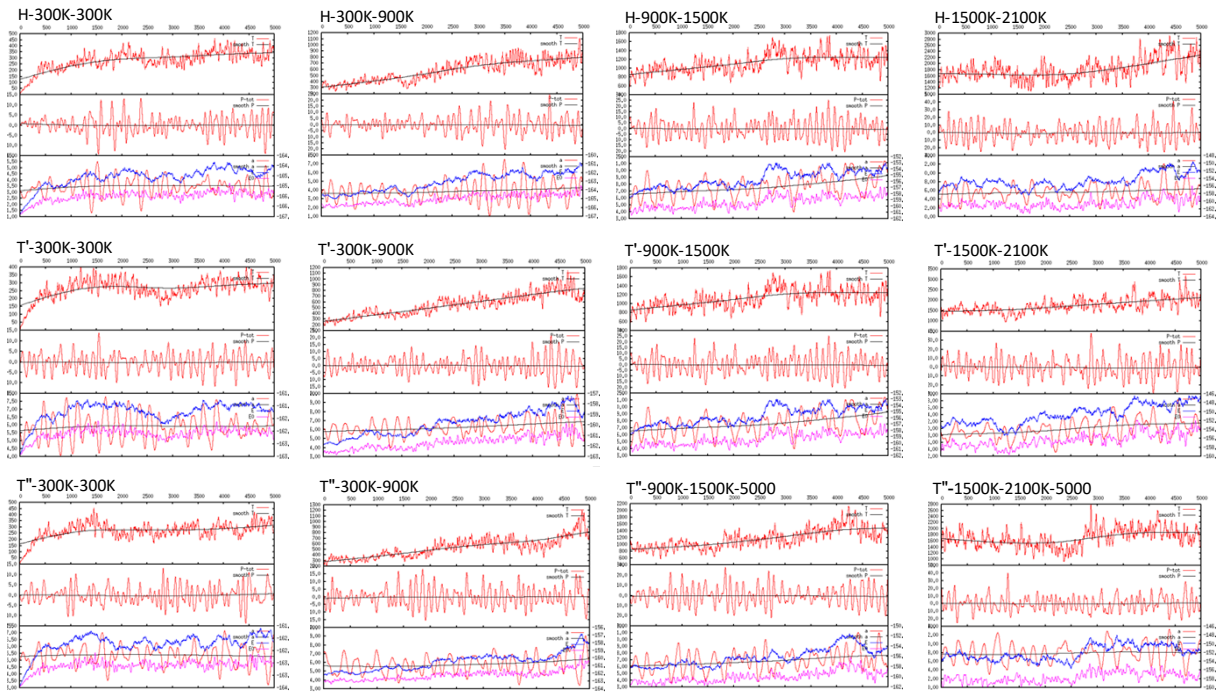

S10) 300K-2100K AIMD simulations for H, T' and T'' phases of MoTe<sub>2</sub>

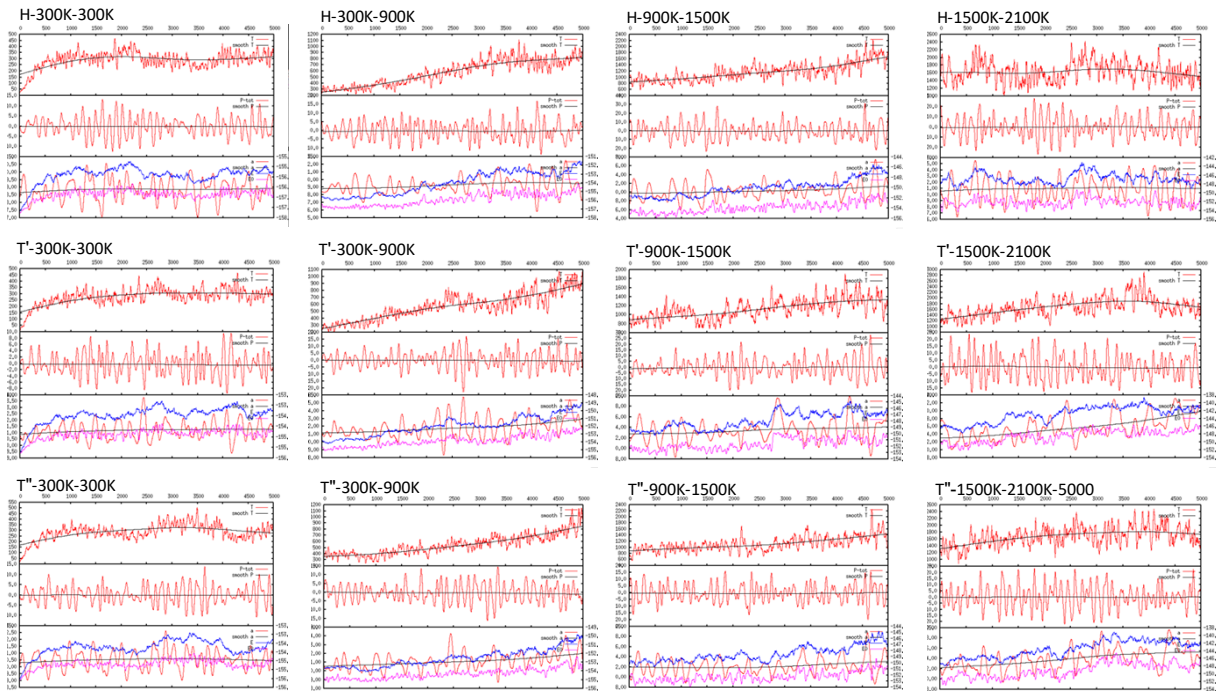

S11) 300K-2100K AIMD simulations for H, T' and T'' phases of MoSeTe

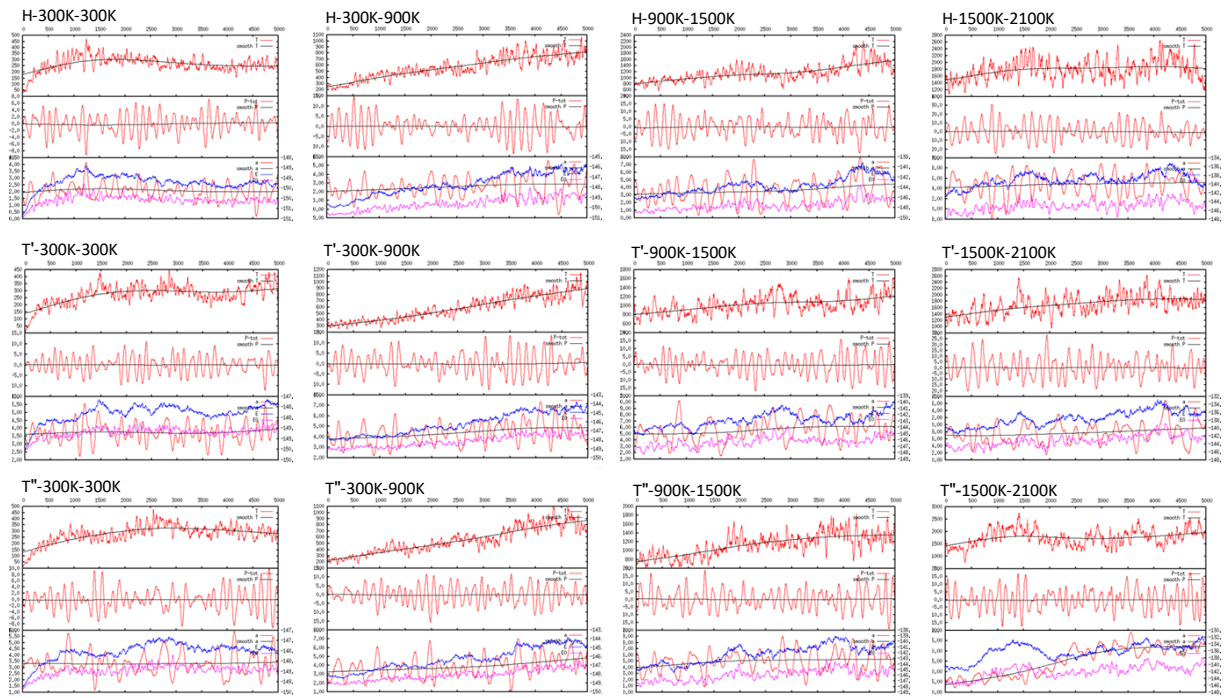

S12) 300K-2100K AIMD simulations for H, T' and T'' phases of WSe

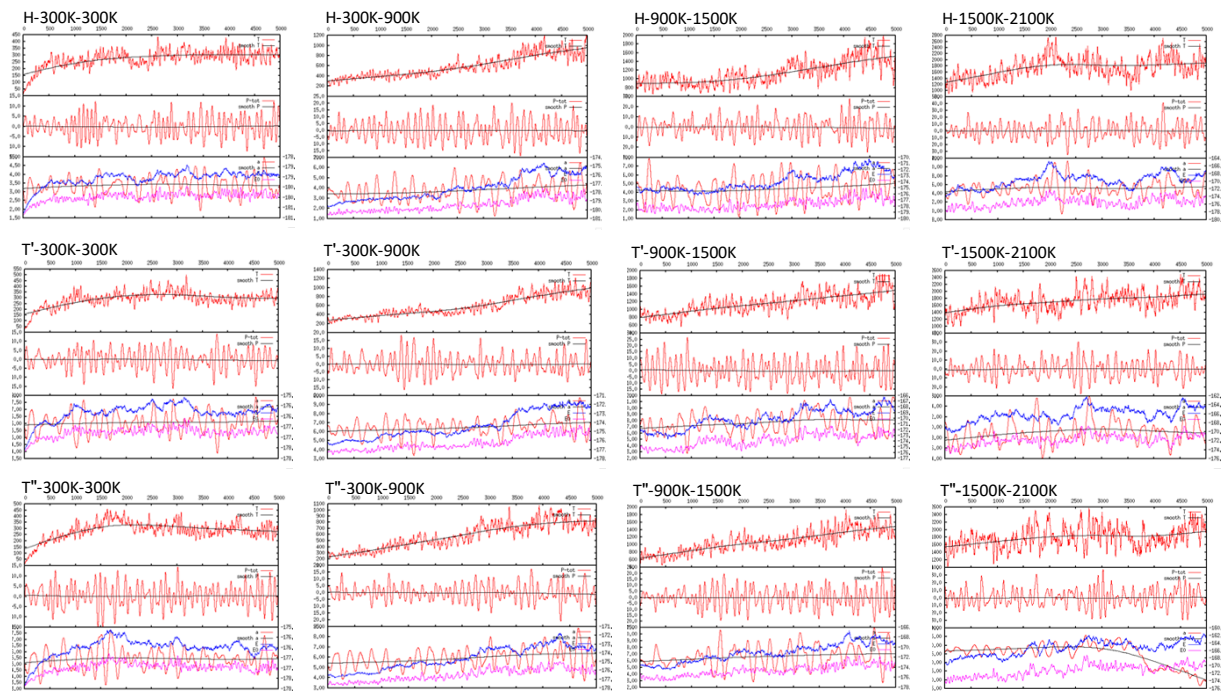

S13) 300K-2100K AIMD simulations for H, T' and T'' phases of WSTe

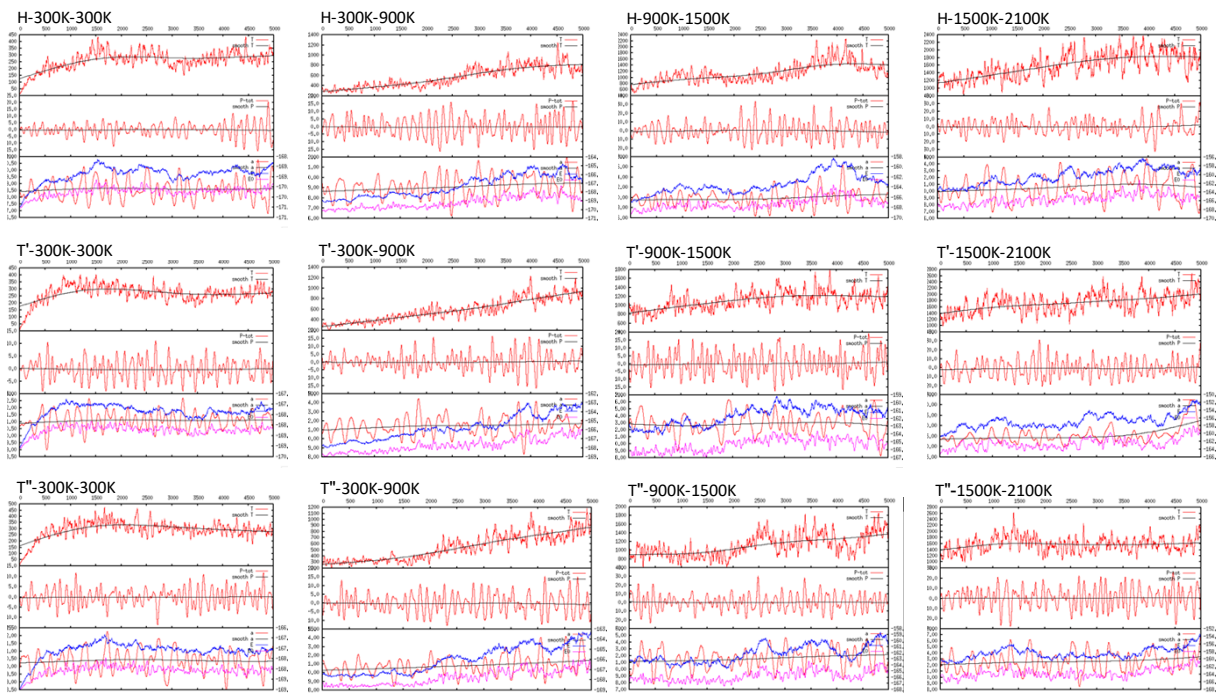

S14) 300K-2100K AIMD simulations for H, T' and T'' phases of WSeTe

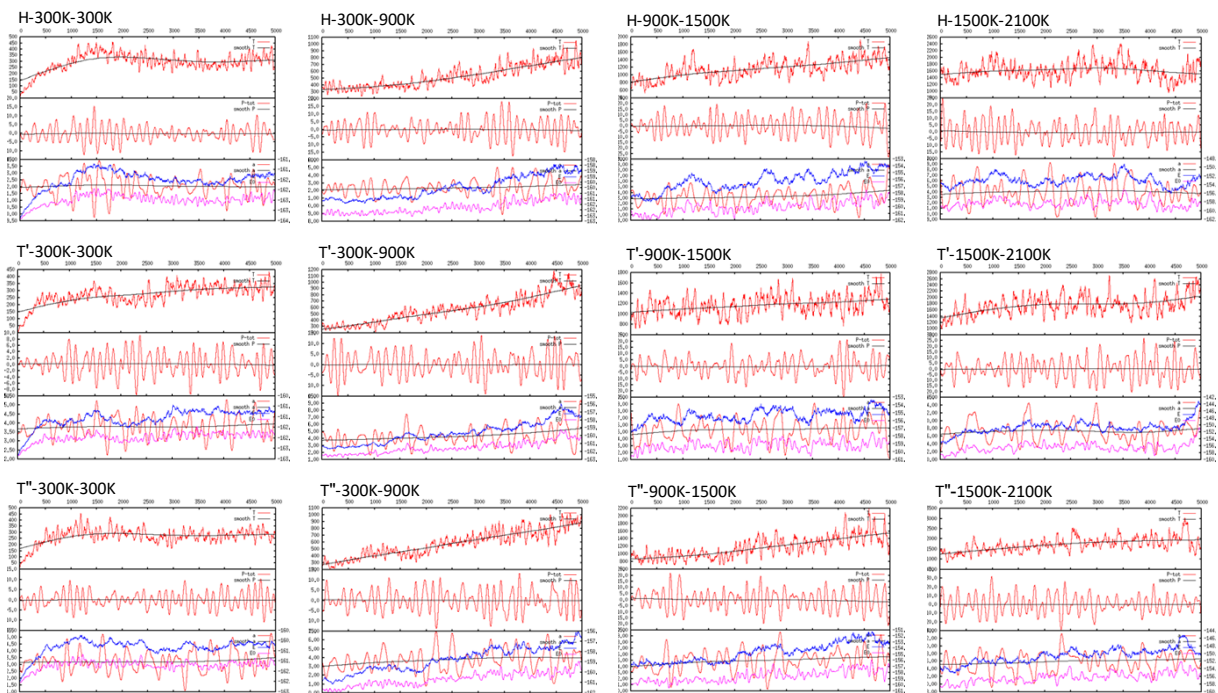



S15) 300K-1500K AIMD Simulations of 2x2 lateral size mixed HT', HT'' and T'T'' phases of MoS<sub>2</sub>

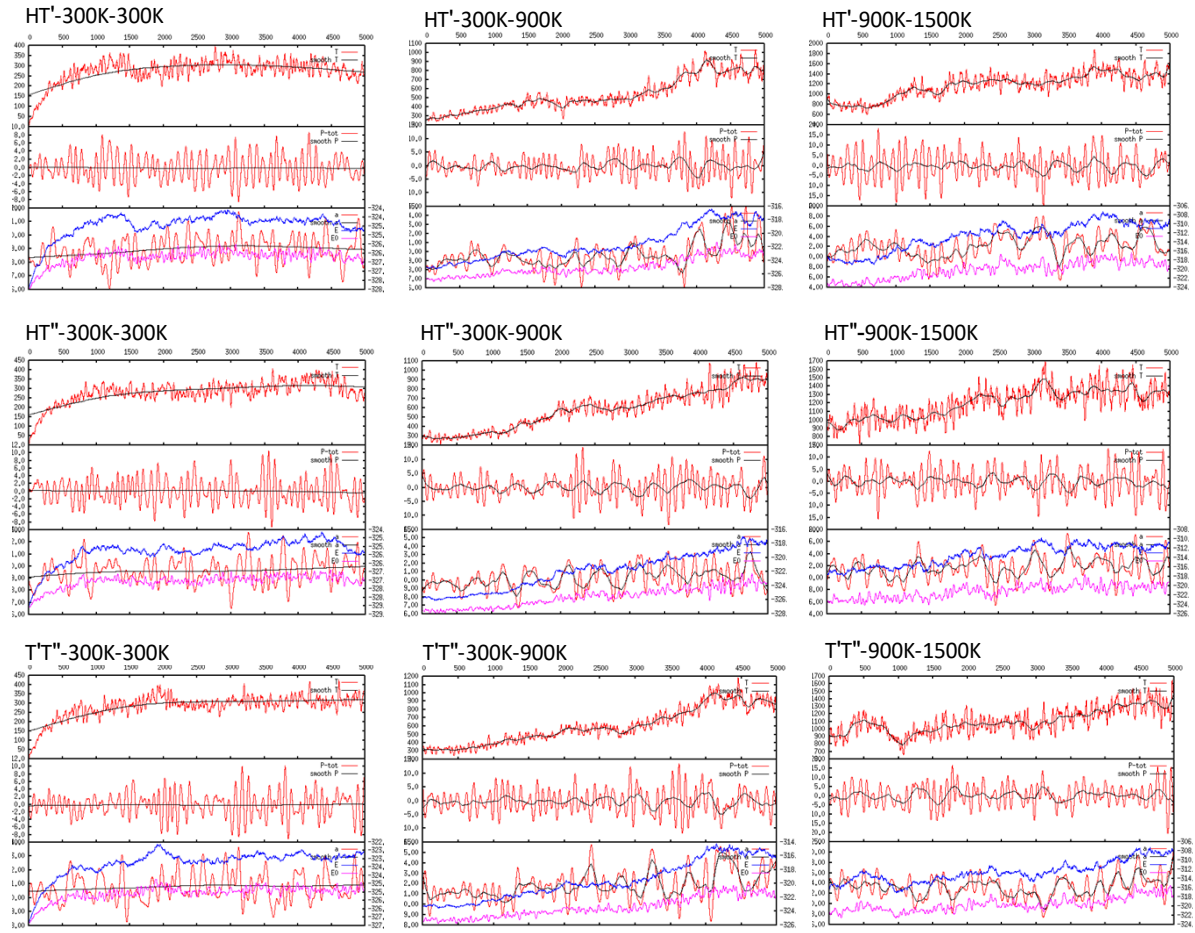

S16) 300K AIMD Simulations of different lateral size mixed HT' phases of MoSSe

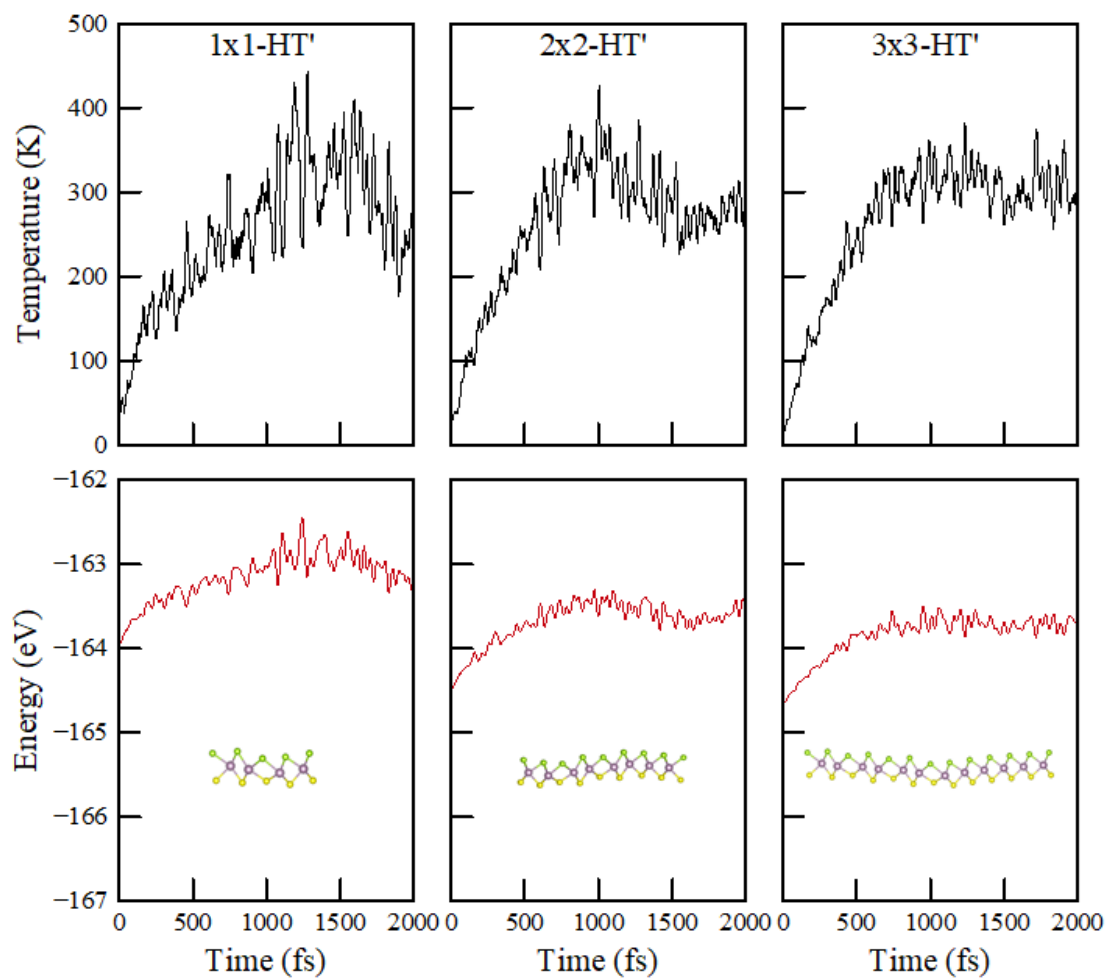

S17) Transition state structures between H, T' and T'' phases for MoS<sub>2</sub> as an example. All the other materials follow the same transition path.

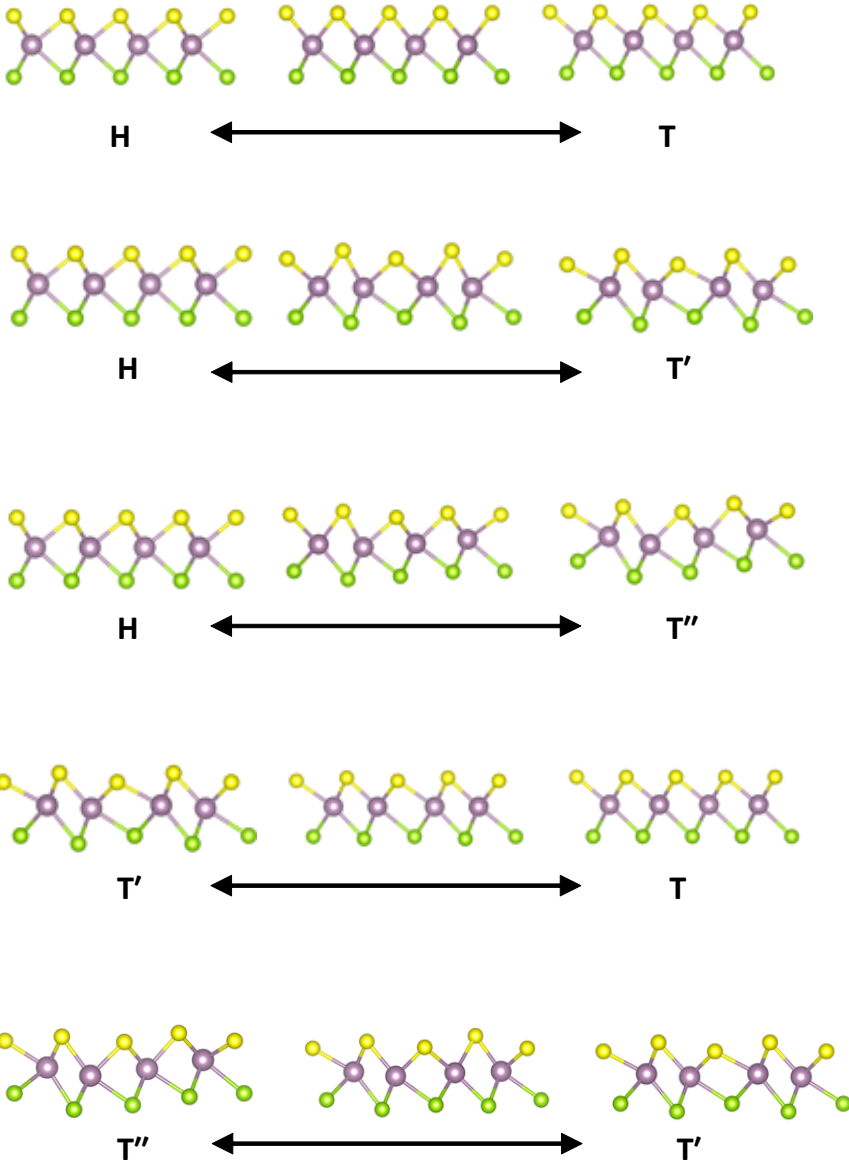

S18) Phonon structures of H phase for MoS<sub>2</sub>, MoSSe, MoSe<sub>2</sub>, WS<sub>2</sub>, WSSe, and WSe<sub>2</sub>

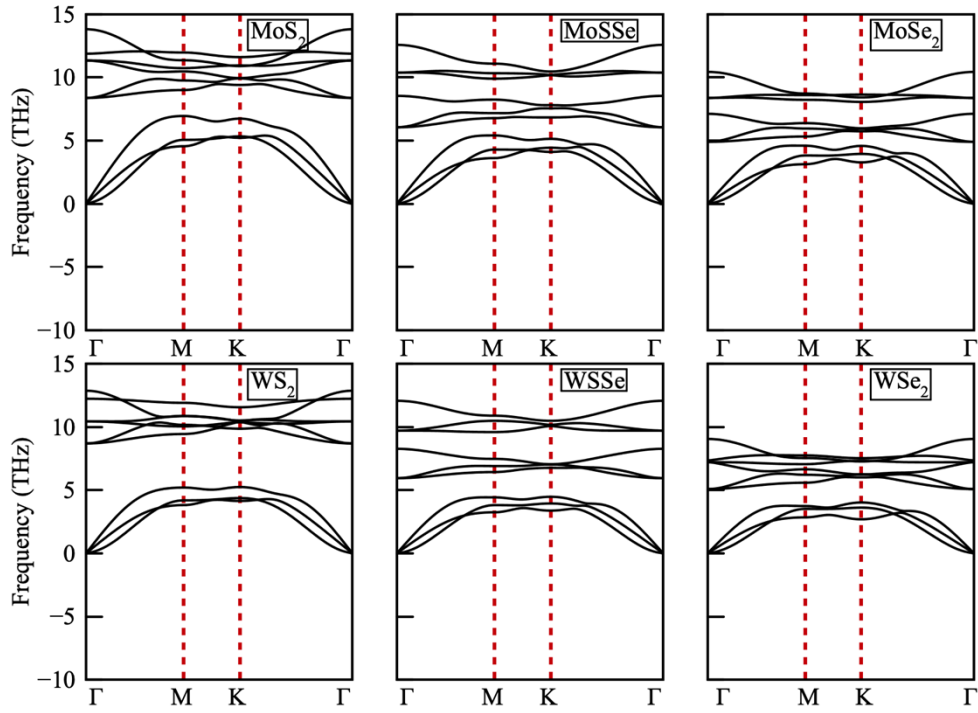

S18)

S19) Phonon structures of T phase for MoS<sub>2</sub>, MoSSe, MoSe<sub>2</sub>, WS<sub>2</sub>, WSSe, and WSe<sub>2</sub>

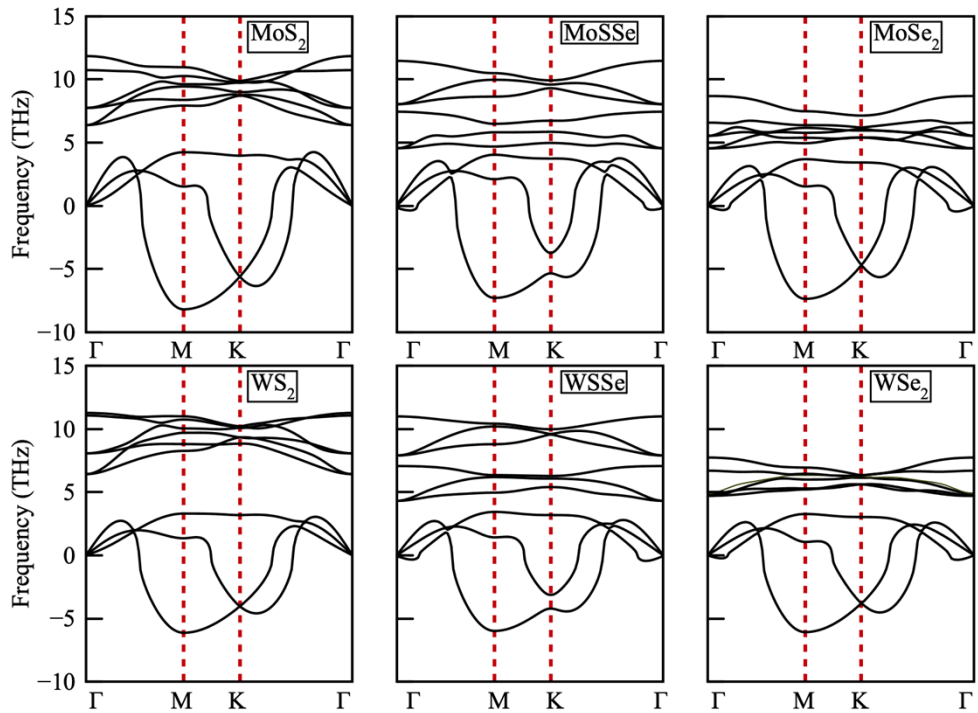

S20) Phonon structures of T' phase for MoS<sub>2</sub>, MoSSe, MoSe<sub>2</sub>, WS<sub>2</sub>, WSSe, and WSe<sub>2</sub>

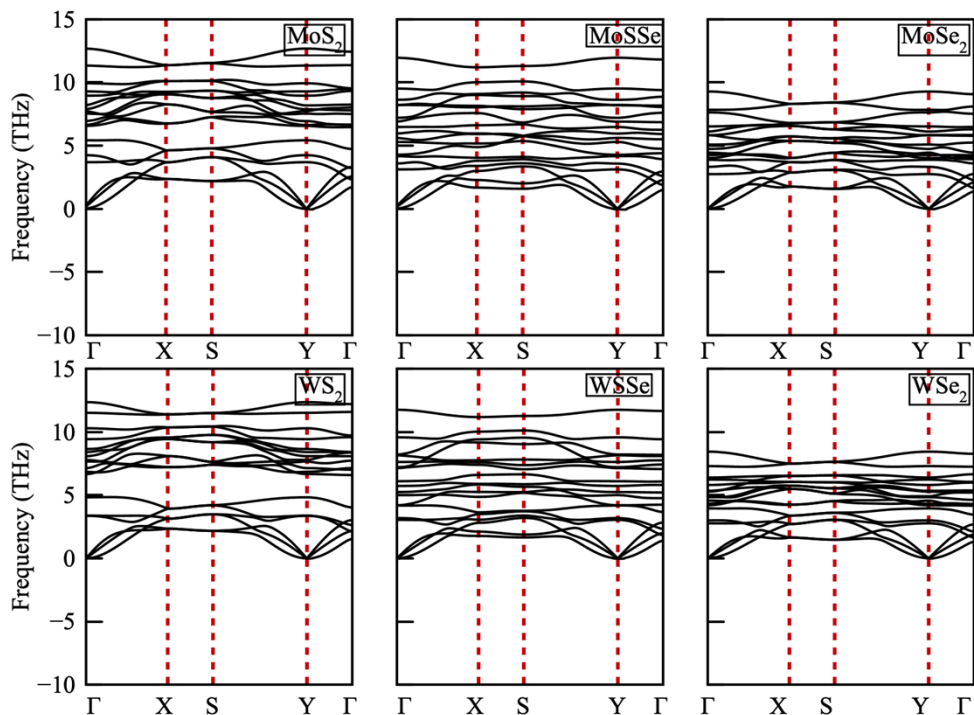

S21) Phonon structures of T'' phase for MoS<sub>2</sub>, MoSSe, MoSe<sub>2</sub>, WS<sub>2</sub>, WSSe, and WSe<sub>2</sub>

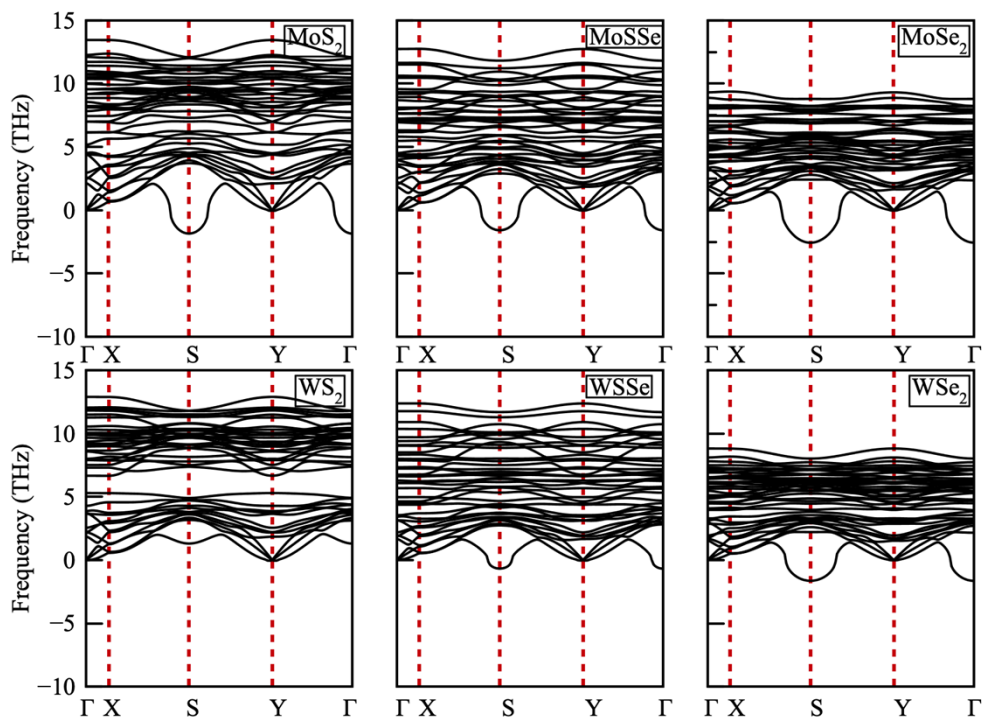

Table 1) Relative energy values of mixed HT' phases of MoSSe for different merging configurations.

|   | 1x1     | 2x2     | 3x3     |
|---|---------|---------|---------|
| a | -163.40 | -164.21 | -164.49 |
| b | -163.93 | -164.48 | -164.65 |
| c | -163.93 | -162.95 | -163.67 |
| d | -163.40 | -163.19 | -164.03 |
